# Supplementary material
Source: PubMed Central journal article supplement (PMC4405168)

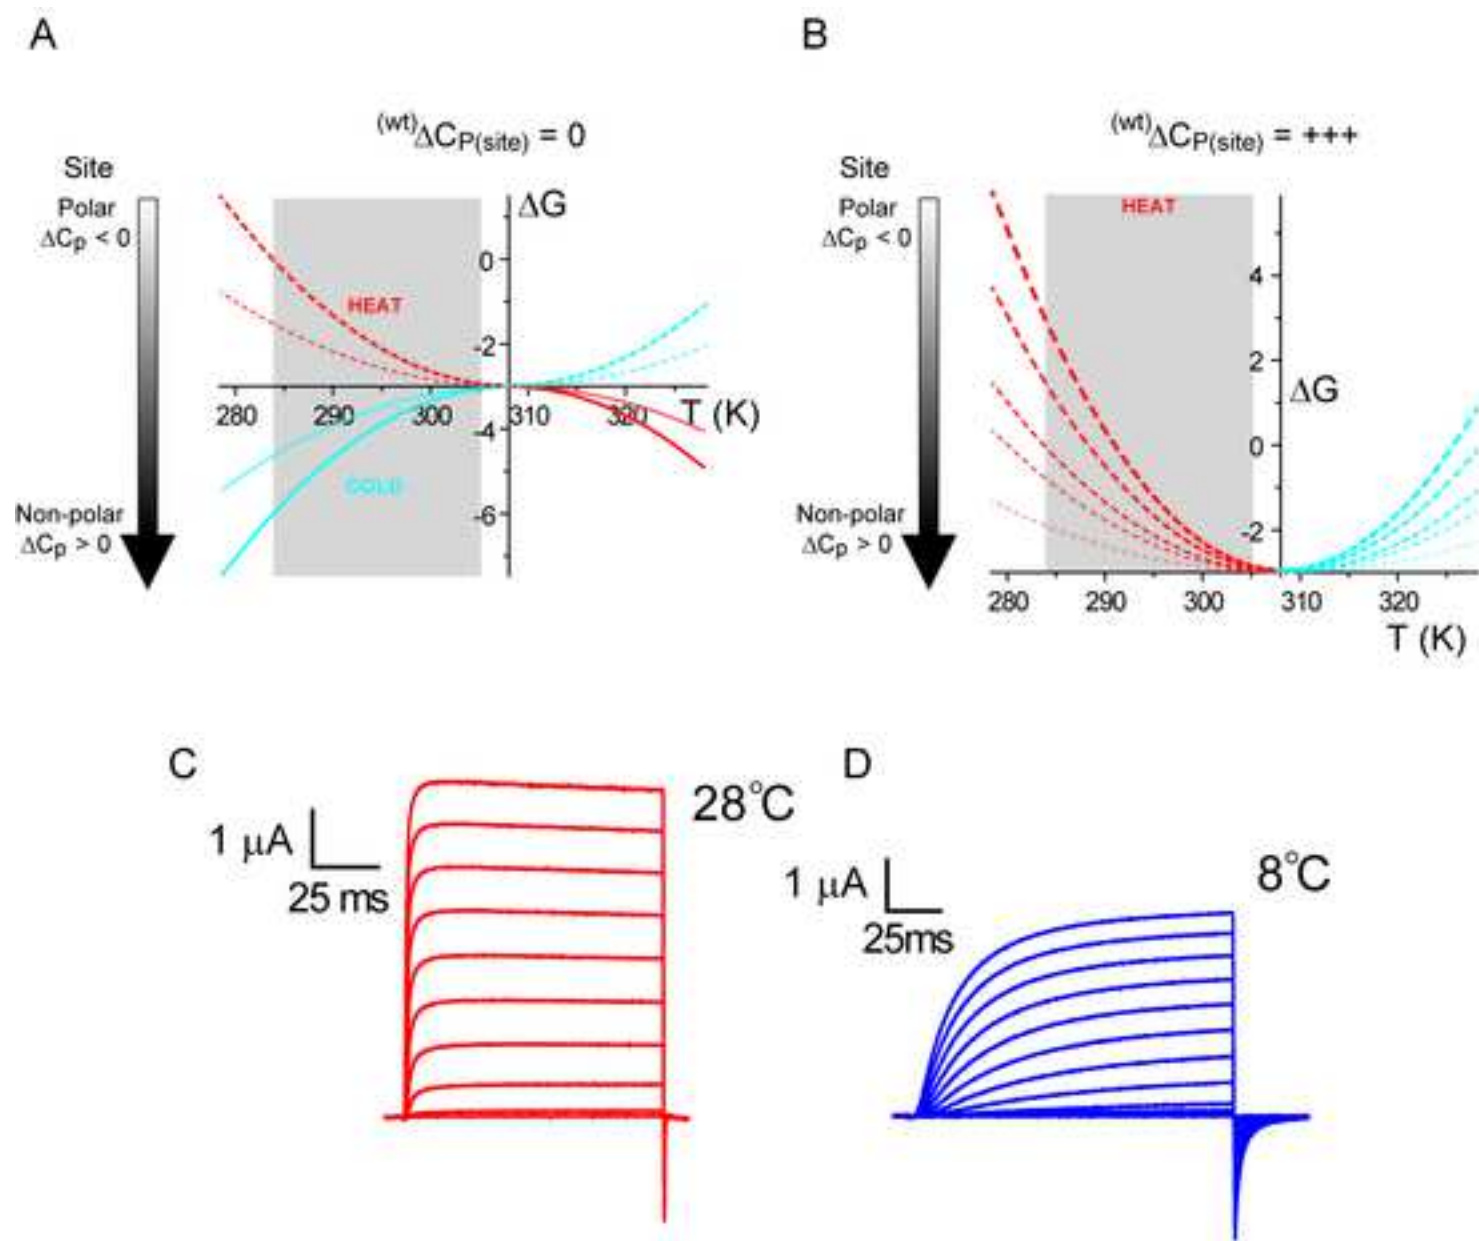

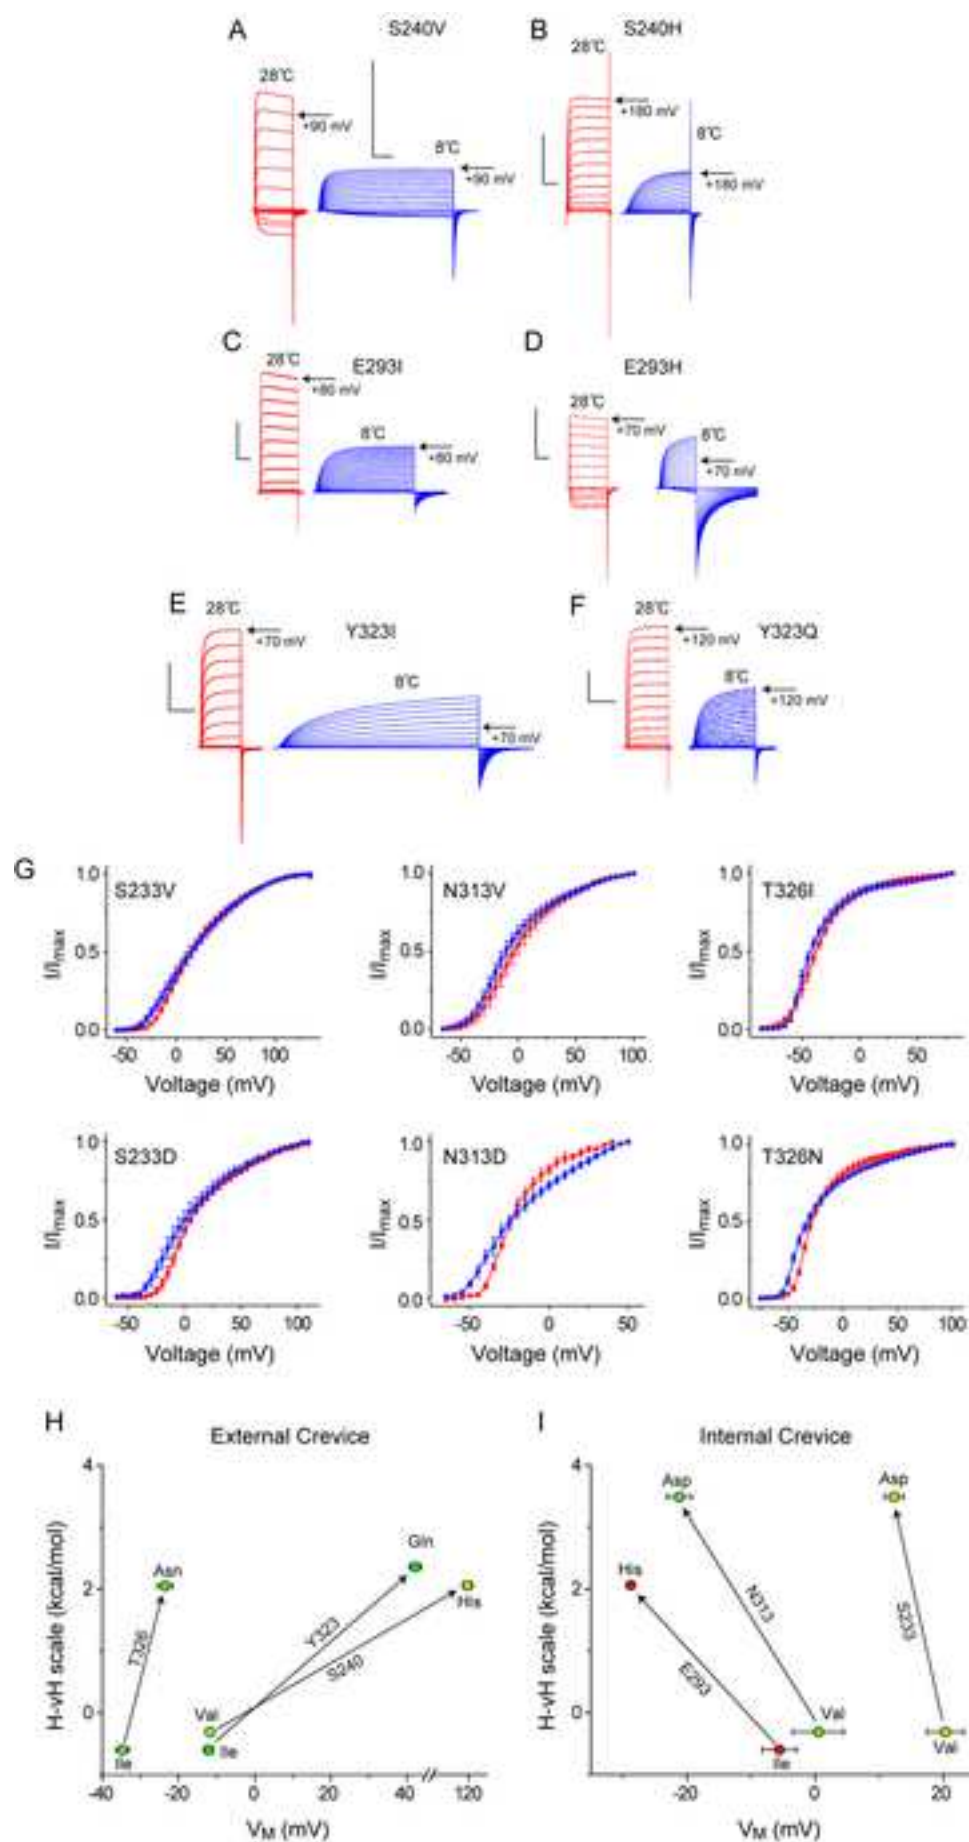

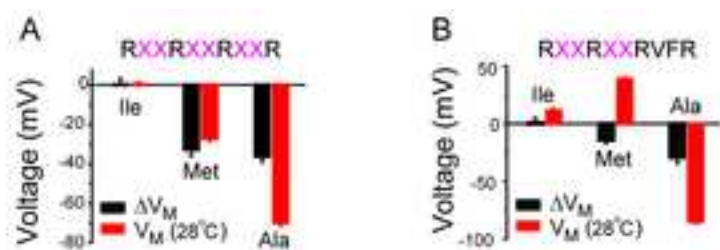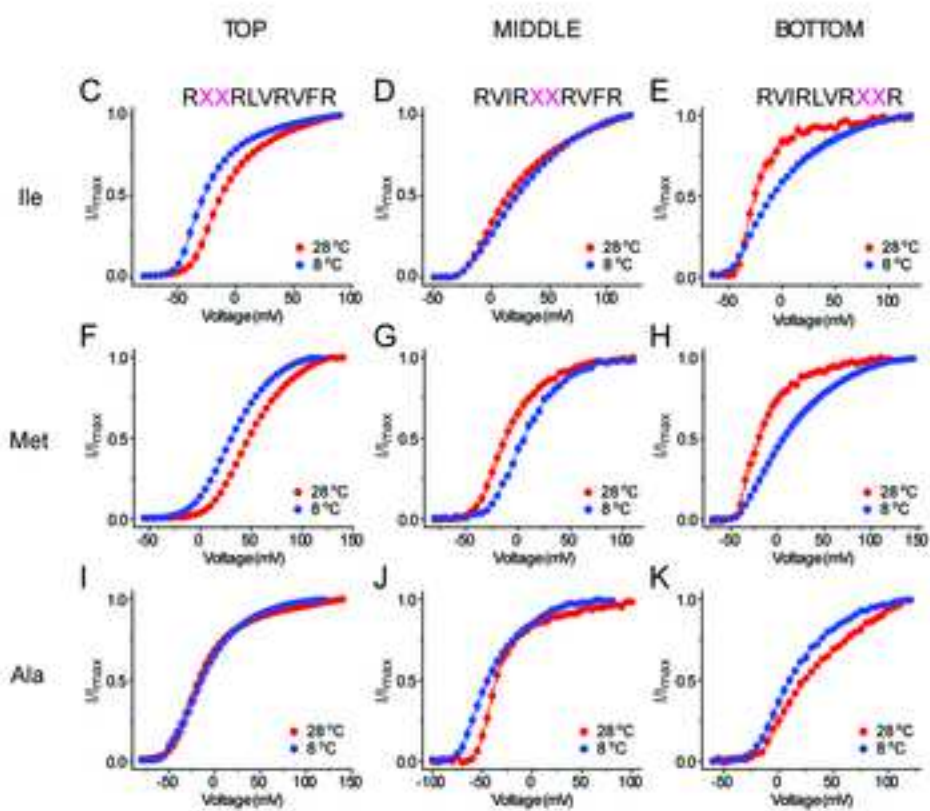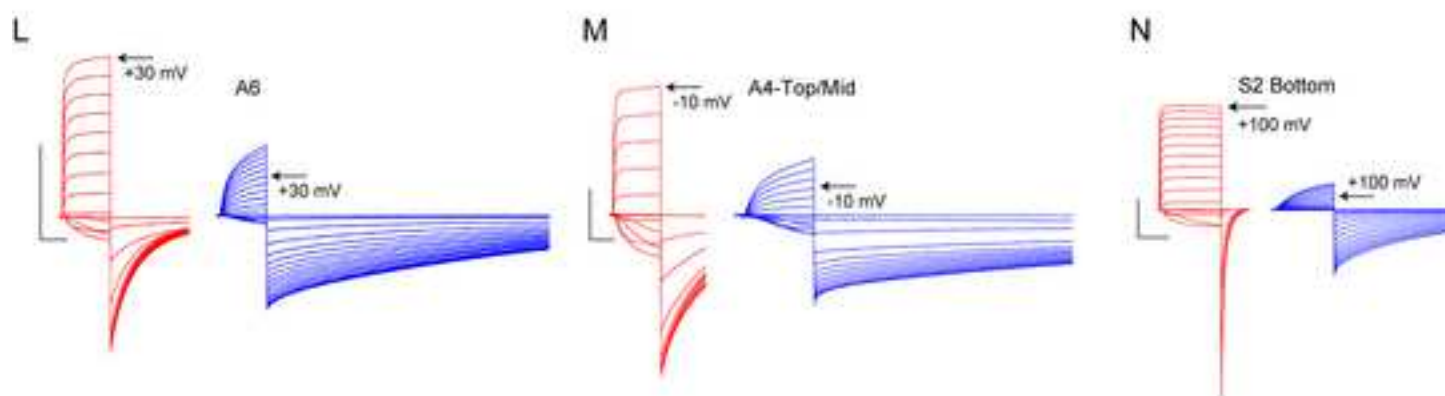

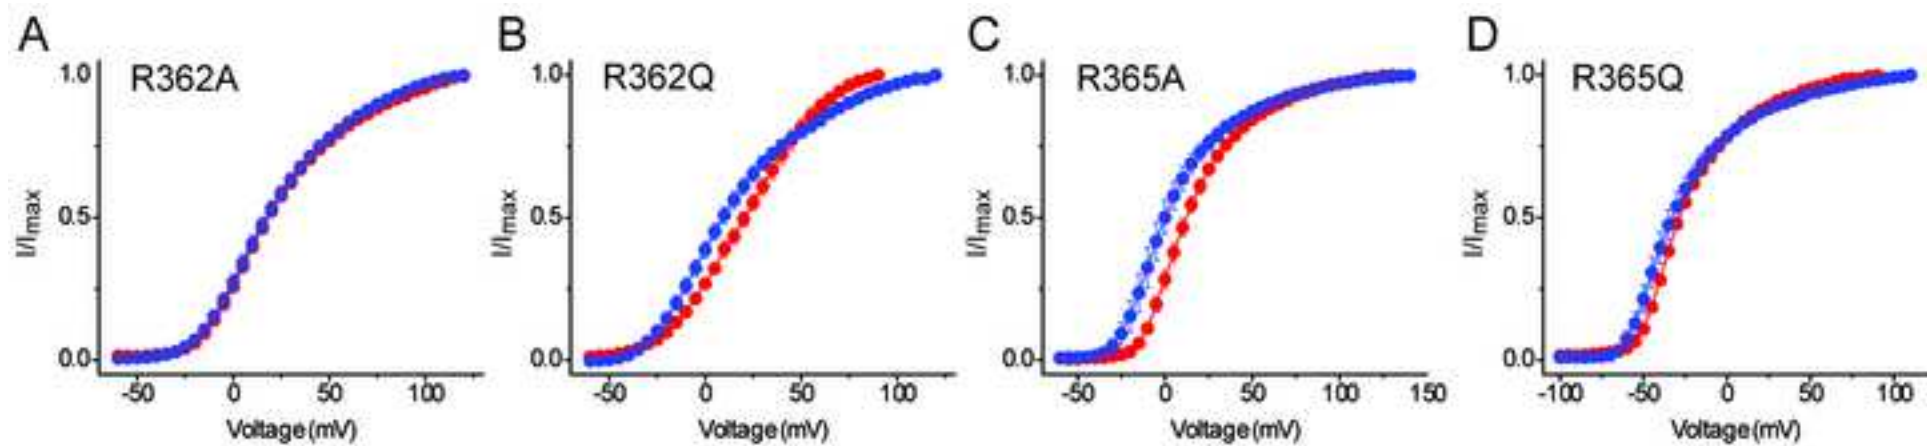

Supplemental Figure 4

Supplement: NIHMS618790-supplement-02.pdf [file NIHMS618790-supplement-02.pdf]
